# Supplementary material
Source: publisher figshare collection journal article supplement (https://acs.figshare.com/ndownloader/files/4504951)
Supplement: Supplementary file 1 [file 4504951]

## Supporting Information

# Enhanced Charge Transport in Polymer Thin-Film Transistors Prepared by Contact Film Transfer Method

*Qingshuo Wei, Shoji Miyanishi, Keisuke Tajima\*, and Kazuhito Hashimoto\**

### Synthesis of Poly(3-butylthiophene)

2,5-dibromo-3-butylthiophene (500 mg, 1.7 mmol) and 20 mL of anhydrous THF was added to a two-necked 100 mL round-bottom flask. *t*-BuMgCl (1.7 mmol) was then added via syringe in one portion. After the solution was heated to reflux and stirred for 2 h, heating bath was removed and Ni(dppp)Cl<sub>2</sub> (7.7 mg, 0.014 mmol) was added. After 10min stirring 20ml of anhydrous THF was added into reaction mixture to prevent precipitation of polymerized compound. The mixture was further stirred for 0.5 h at room temperature, and the reaction solution was quenched with 5M HCl. The polymer was extracted with chlorobenzene and sequentially washed with 1M HCl, saturated NaHCO<sub>3</sub> aq., and water. After chlorobenzene was evaporated, the residue was precipitated into MeOH and Hexane several times. After filtration, the residue was dried under vacuum to give 85 mg of poly(3-butylthiophene) in 36% yield.

<sup>1</sup>H NMR (500 MHz, C<sub>6</sub>D<sub>5</sub>Cl): 6.97 (s, 1H), 2.84 (t, 2H), 1.66 (m, 2H), 1.39 (m, 2H), 0.88 (t, 3H). Regioregularity (RR) was determined as > 98% by <sup>1</sup>H NMR and *M*<sub>n</sub> = 18000 and PDI = 1.4 determined by GPC (Solvent: Chlorobenzene).

## **Synthesis of Poly(3-octylthiophene), Poly(3-decylthiophene) and Poly(3-dodecylthiophene)**

2,5-dibromo-3-octylthiophene (1.5 mmol) and 12 mL of anhydrous THF was added to two-necked 50 mL round-bottom flasks. *t*-BuMgCl (1.5 mmol) was then added via syringe in one portion. After the solution was heated to reflux and stirred for 2 h, heating bath was removed and Ni(dppp)Cl<sub>2</sub> (6.9 mg, 0.013 mmol) was added. The mixture was stirred for 12 h at room temperature, and the reaction solution was quenched with 5M HCl. The polymer was extracted with chloroform and sequentially washed with 1M HCl, saturated NaHCO<sub>3</sub> aq., and water. After dried with MgSO<sub>4</sub>, CHCl<sub>3</sub> was evaporated and the residue was precipitated into MeOH. After filtration, the polymer was purified by Soxhlet extraction with MeOH and hexane, sequentially. The polymer was extracted with CHCl<sub>3</sub> and reprecipitated into MeOH. The suspension was filtered and the residue was dried under vacuum to obtain Poly(3-octylthiophene). Poly(3-decylthiophene) and Poly(3-dodecylthiophene) were synthesized by same procedure.

**Poly(3-octylthiophene).** yield: 47%;

<sup>1</sup>H NMR (500 MHz, CDCl<sub>3</sub>): 6.98 (s, 1H), 2.80 (t, 2H), 1.71 (m, 2H), 1.42 (m, 2H), 1.34 (m, 8H), 0.87 (t, 3H). RR: > 97% determined by <sup>1</sup>H NMR and *M*<sub>n</sub> = 25000 (PDI = 1.2) determined by GPC (Solvent: CHCl<sub>3</sub>).

**Poly(3-decylthiophene).** yield: 41%.

<sup>1</sup>H NMR (500 MHz, CDCl<sub>3</sub>): 6.98 (s, 1H), 2.80 (t, 2H), 1.70 (m, 2H), 1.41 (m, 2H), 1.35

(m, 2H), 1.27 (m, 10H), 0.87 (t, 3H) RR: > 97% determined by  $^1\text{H}$  NMR and  $M_n = 22000$  (PDI = 1.2) determined by GPC (Solvent:  $\text{CHCl}_3$ ).

**Poly(3-dodecylthiophene).** yield: 55%.

$^1\text{H}$  NMR (500 MHz,  $\text{CDCl}_3$ ): 6.98 (s, 1H), 2.79 (t, 2H), 1.69 (m, 2H), 1.42 (m, 2H), 1.35 (m, 2H), 1.26 (m, 14H), 0.87 (t, 3H). RR: > 98% determined by  $^1\text{H}$  NMR and  $M_n = 25000$  (PDI = 1.2) determined by GPC (Solvent:  $\text{CHCl}_3$ ).

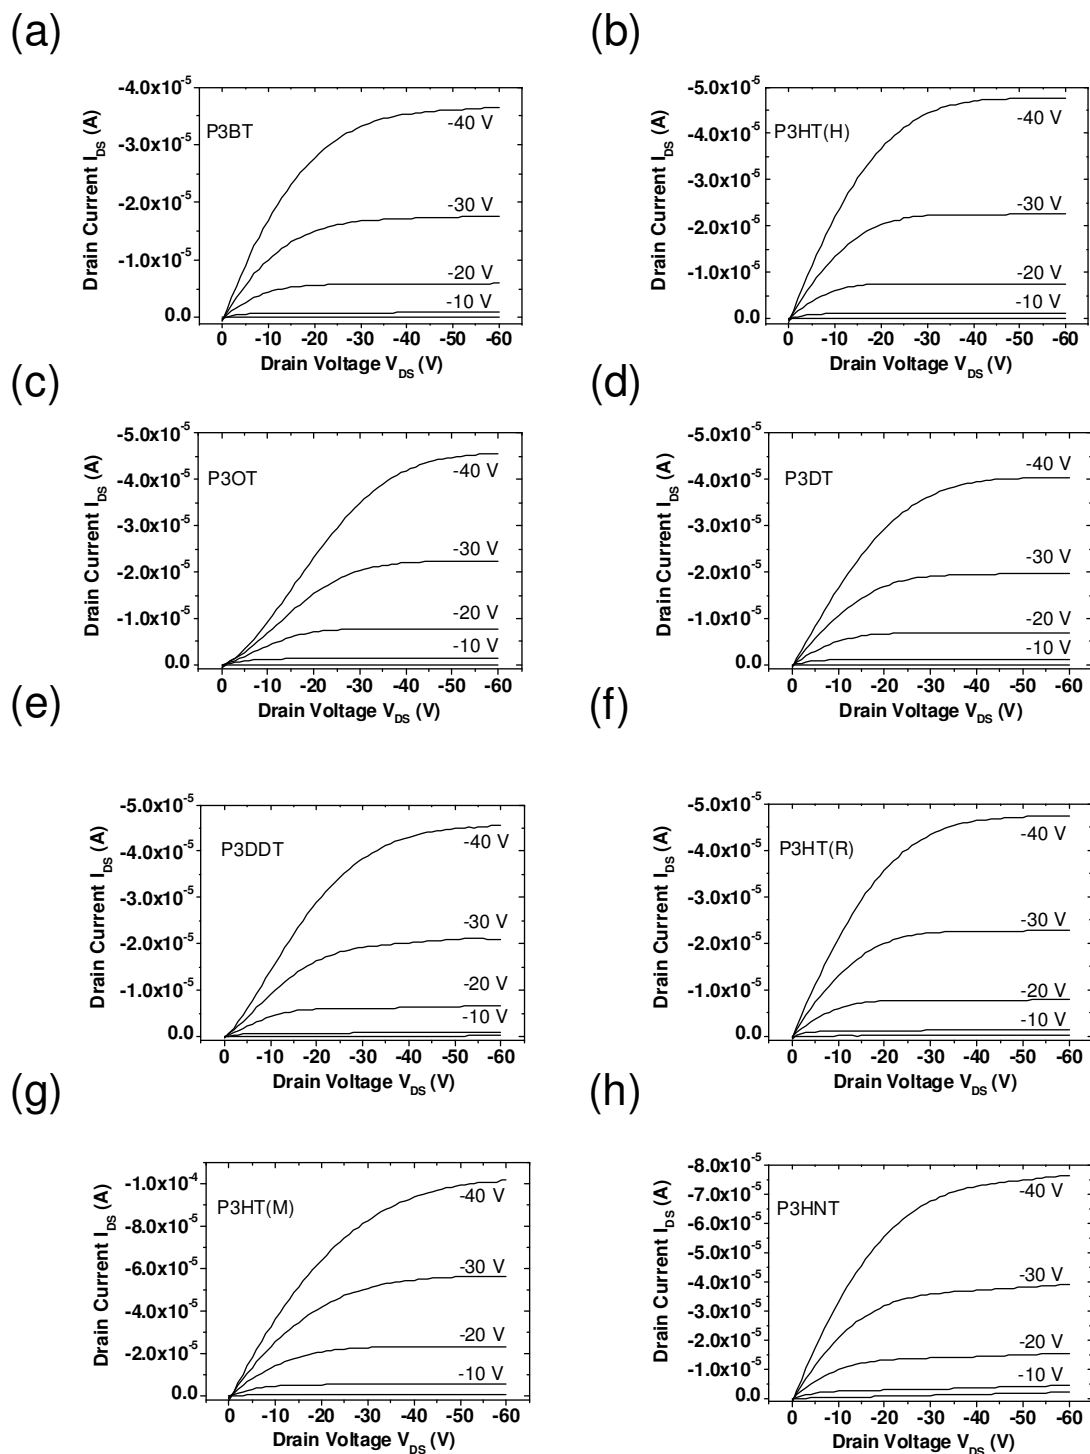

**Figure S1.** Output characteristics of the transistors prepared by the contact film transfer: a) P3BT; b) P3HT (Home); c) P3OT; d) P3DT; e) P3DDT; f) P3HT (Rieke); g) P3HT (Merck); h) P3HNT.

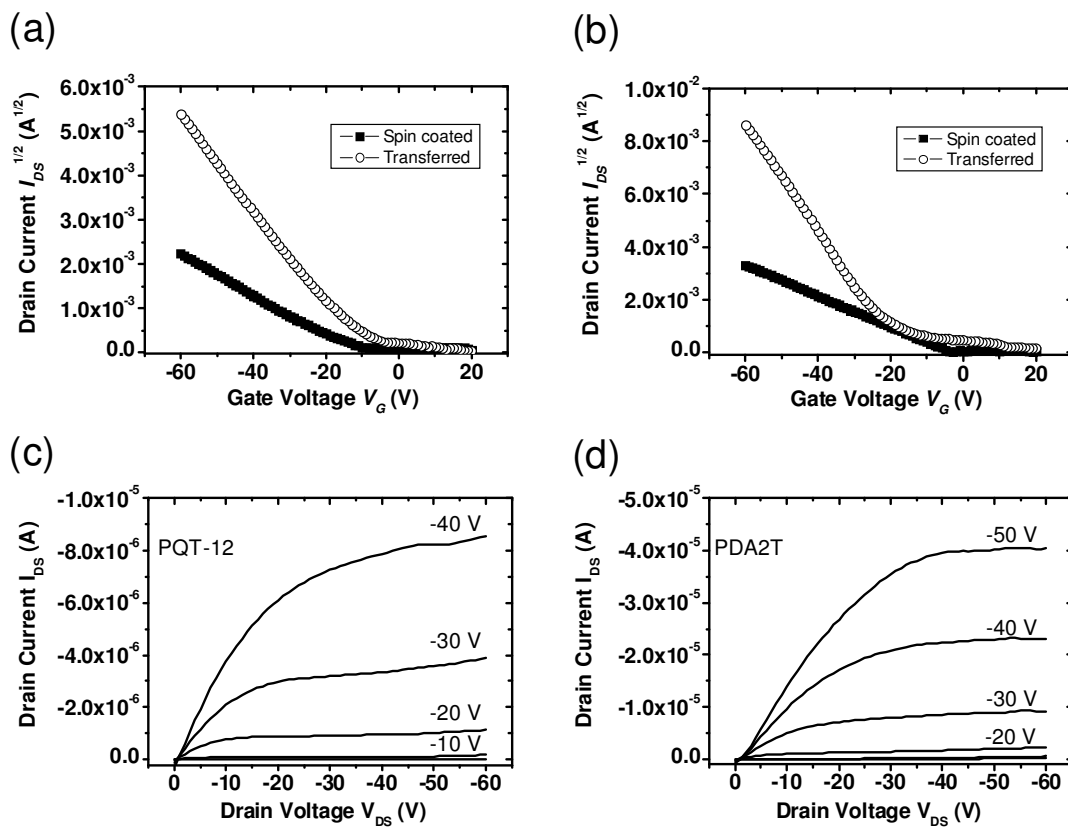

**Figure S2.** Transfer characteristics of the transistors prepared by the spin coating (closed squares) and by the contact film transfer (open circles): a) PQT-12 and b) PDA2T; Output characteristics of the transistors prepared by contact film transfer: c) PQT-12 and d) PDA2T.
